# Supplementary material for: Tae-miR397 Negatively Regulates Wheat Resistance to Blumeria graminis
Source: MDPI journal article supplement (doi:10.3390/plants12173096), 2023-08-29
Supplement: s1 [file s1]

**Table S1.** Primers used in the study.

| Primers      | Sequence (5'-3')                        | objective                     |
|--------------|-----------------------------------------|-------------------------------|
| qTae-miR397  | TCACCGGCGCTGCACACAATG                   | qRT-PCR                       |
| qTatubulin-F | ATCTCCAACTCCACCAGTGTCG                  | qRT-PCR                       |
| qTatubulin-R | TCATCGCCCTCATCACCGTC                    | qRT-PCR                       |
| qTae-WIP-F   | GCGCAGACGCAGAGAGAAAG                    | qRT-PCR                       |
| qTae-WIP-R   | GTCCTTGAGCGCCTCCAC                      | qRT-PCR                       |
| TaPR1-F      | GAGAATGCAGACGCCCAAGC                    | qRT-PCR                       |
| TaPR1-R      | CTGGAGCTTGAGTCGTTGATC                   | qRT-PCR                       |
| TaPR2-F      | AGGATGTTGCTTCCATGTTTGCCG                | qRT-PCR                       |
| TaPR2-R      | AAGTAGATGCGCATGCCGTTGATG                | qRT-PCR                       |
| TaPR4A-F     | CGTCTTCACCAAGATCGACA                    | qRT-PCR                       |
| TaPR4A-R     | GGCAGTCGACGAAGTGGTA                     | qRT-PCR                       |
| TaPR4B-F     | CTTCACCAAGATCGACACCA                    | qRT-PCR                       |
| TaPR4B-R     | AGCAAGCTAGCCTTTGATCG                    | qRT-PCR                       |
|              | <u>TAGCTGAGCGGCCCGCCCCGGGGTGCGCCTTG</u> |                               |
| VIGS-WIP-F   | CGCAGCTTCG                              | Make silence of WIP           |
|              | <u>TAGCTGATTAATTAACCCGGGGCAAGGGGAG-</u> |                               |
| VIGS-WIP-R   | GAACAGGATC                              | Make silence of WIP           |
| OTaemiR397-F | <u>GGATCC</u> ACACCTCATCATACTACTAC      | Make overexpression of miR397 |
| OTaemiR397-R | <u>GGTACCA</u> ACTGAGTCTCTTCTCTCCG      | Make overexpression of miR397 |

Note: The underlined bases are restriction enzyme sites or adaptor sequence.

**Table S2.** Target genes prediction.

| miRNA ACC.                     | Target Acc.          | Expect | UPE | Alignment                                                                  |
|--------------------------------|----------------------|--------|-----|----------------------------------------------------------------------------|
| Using tae-miR397-5p as request |                      |        |     |                                                                            |
| UCACCGGCGCUGCACACAAUG          | TraesCS6A02G134500.1 | 0.0    | N/A | miRNA 21 GUAACACACGUCGCGGCCACU 1<br>Target 504 CAUUGUGUGCAGCGCCGGUGA 524   |
| UCACCGGCGCUGCACACAAUG          | TraesCS7D02G230400.1 | 1.5    | N/A | miRNA 21 GUAACACACGUCGCGGCCACU 1<br>Target 287 GCUUGUGCGCGCGCCGGUGA 307    |
| UCACCGGCGCUGCACACAAUG          | TraesCS2B02G406200.1 | 2.5    | N/A | miRNA 21 GUAACACACGUCGCGGCCACU 1<br>Target 1593 GGUUGUGCGCAGUGCCGGUGC 1613 |
| UCACCGGCGCUGCACACAAUG          | TraesCS2A02G299200.1 | 2.5    | N/A | miRNA 21 GUAACACACGUCGCGGCCACU 1<br>Target 179 ACUUGUUUGCGGUGUCGGUGA 199   |
| Using tae-miR397-X as request  |                      |        |     |                                                                            |
| CAUUGAGUGCAGCGUUGAUGAA         | TraesCS6A02G134500.1 | 0.0    | N/A | miRNA 22 AAGUAGUUGCGACGUGAGUUAC 1<br>Target 554 UUCAUCAACGCUGCACUCAUUG 575 |
| CAUUGAGUGCAGCGUUGAUGAA         | TraesCS1D02G283000.1 | 2.0    | N/A | miRNA 22 AAGUAGUUGCGACGUGAGUUAC 1<br>Target 744 CUCAUCAACGCUGCGCUAACG 765  |
| CAUUGAGUGCAGCGUUGAUGAA         | TraesCS4A02G096400.1 | 2.0    | N/A | miRNA 22 AAGUAGUUGCGACGUGAGUUAC 1<br>Target 772 CUGAUCAACGCUGCGCUAACG 793  |
| CAUUGAGUGCAGCGUUGAUGAA         | TraesCS4D02G208900.1 | 2.0    | N/A | miRNA 22 AAGUAGUUGCGACGUGAGUUAC 1<br>Target 767 CUGAUCAACGCUGCGCUAACG 788  |



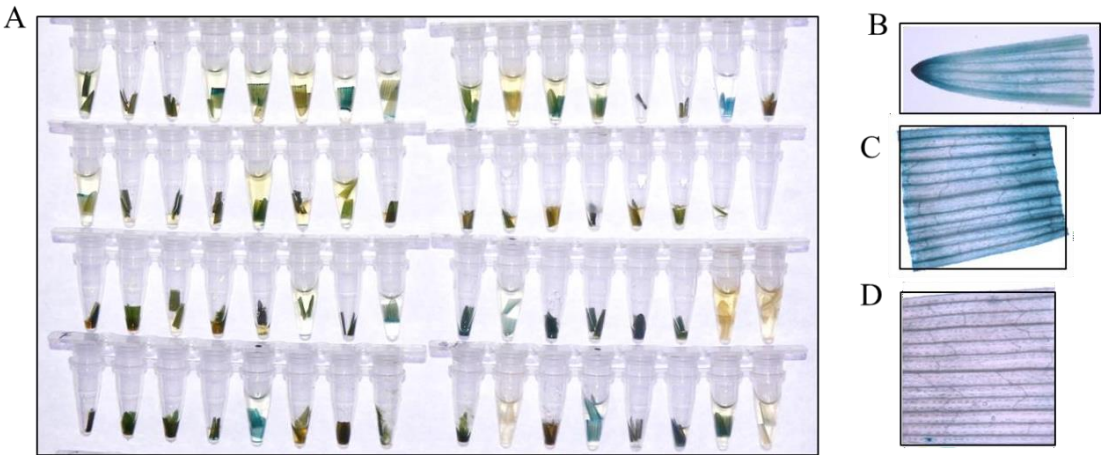

**Figure S2.** Positive transgenic plants selected by GUS staining. (A) GUS staining of the transgenic plants overexpressing *tae-miR397*. (B–C) Leaves dyed blue were candidate positive transgenic plants. (D) WT leaves dyed in GUS staining.

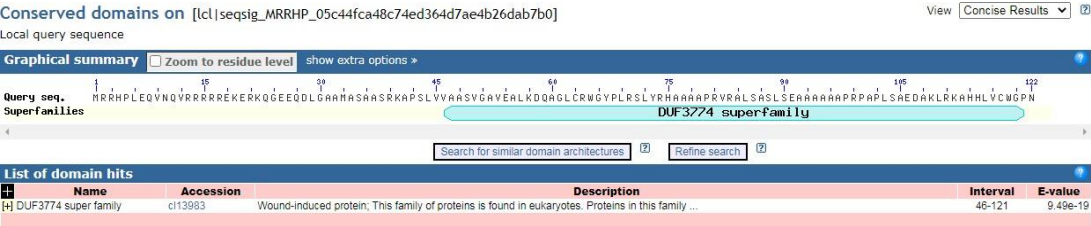

**Figure S3.** Prediction of conserved domain of target gene (WIP) online.

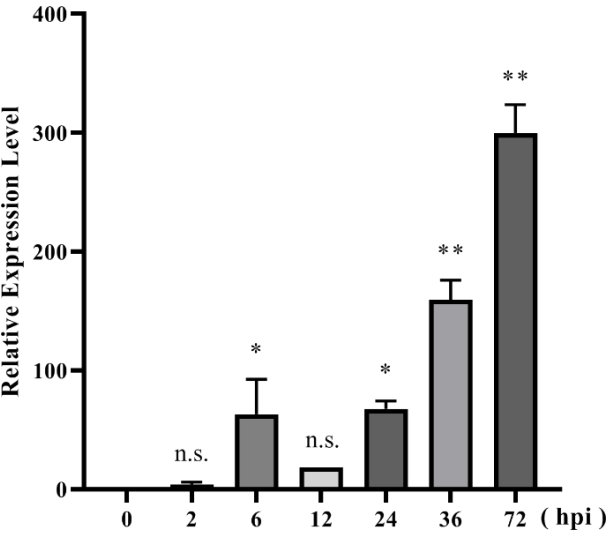

**Figure S4.** Expression pattern of target gene (Tae-WIP) in wheat plants after inoculation of *Bgt*. Relative expression levels are representative of the mean values of three biological replicates. Error bars represent one standard deviation (SD). The \* and \*\* represent significant differences at levels of  $P < 0.05$  and  $P < 0.01$  between the control and treatment groups using Tukey's multiple comparisons test.
